# Supplementary material for: Protective Effect of Dietary Taurine from ROS Production in European Seabass under Conditions of Forced Swimming
Source: MDPI journal article supplement (doi:10.3390/ani9090607), 2019-08-26
Supplement: s1 [file s1]

# PROTECTIVE EFFECT OF DIETARY TAURINE FROM ROS PRODUCTION IN EUROPEAN SEABASS UNDER CONDITIONS OF FORCED SWIMMING.

Chiara Ceccotti<sup>1</sup>, Basim S.A. Al-Sulaivany<sup>2</sup>, Omar A.M. Al-Habbib<sup>3</sup>, Marco Saroglia<sup>1</sup>, Simona Rimoldi<sup>1</sup>, and Genciana Terova<sup>1,\*</sup>

<sup>1</sup> Department of Biotechnology and Life Sciences, University of Insubria, 21100 Varese, Italy

<sup>2</sup> Department of Biology, Faculty of Science, University of Zakho, Zakho, 420011 Kurdistan Region-Iraq

<sup>3</sup> College of Science, International University of Erbil, 44001 Kurdistan Region-Iraq

\* Correspondence: genciana.terova@uninsubria.it, Tel.: +39 0332 421 428

## Supplementary material S1

### Generation of standard curves for cat, sod, and gpx genes

To generate the standard curves defined amounts of mRNAs at tenfold dilutions were subjected to qPCR using iTaq™ Universal Probes One-Step Kit (Bio-Rad, Italy) and Bio-Rad® CFX96™ Real-Time PCR System. The thermal cycling protocol was 10 min at 50 °C, 3 min at 95 °C, followed by 40 cycles consisting of 15 s at 95 °C, and 1 min at 60 °C. The cycle threshold (Ct) values obtained by amplification were used to create standard curves for target genes. This curve served as a basis for calculating the unknown mRNA copies of each gene in each liver and muscle RNA sample.

**Table S1** Sequences of primers used to synthesize standard RNA with relative accession number.

|                        | Symbol | Acc. nr. | Primer Sequence (5'-3')                                                  |
|------------------------|--------|----------|--------------------------------------------------------------------------|
| Superoxide dismutase   | sod    | FJ860004 | F:gtaatacgactcactatagggGTTGGAGACCTGGGAGATGT<br>R:GAAAAGGAGGCAATGAGGAG    |
| Catalase               | cat    | FJ860003 | F:gtaatacgactcactatagggATGGTGTGGGACTTCTGGAG<br>R: CGTTTCTACTGCAAGTTCCACT |
| Glutathione peroxidase | gpx    | FM01366  | F:gtaatacgactcactatagggAGTTAATCCGGAATTCGTGAGA<br>R: CAACAACCAGGGACTACTCA |

**Table S2** Primer sequences and TaqMan® probe of each target gene.

| <i>Gene</i>                   | <i>Symbol</i> | <i>Nucleotide sequence (5'-3')</i>                                                          |
|-------------------------------|---------------|---------------------------------------------------------------------------------------------|
| <i>Superoxide Dismutase</i>   | <i>sod</i>    | F: TGGAGACCTGGGAGATGTAAGT<br>R: CAAGATAGACATCACGGACAAGA<br>Taqman Probe: CAGGAGGAGATAACATTG |
| <i>Catalase</i>               | <i>cat</i>    | F: ATGGTGTGGGACTTCTGGAG<br>R: CATCAGGTGTCTTTCTTGTTTCAGC<br>Taqman probe: TGAGGCCTGAGTGTCTG  |
| <i>Glutathione Peroxidase</i> | <i>gpx</i>    | F: AGTTAATCCGGAATTCGTGAG<br>R:GTTTTACGACCTGACAGCTAAGCT<br>Taqman probe: AATGGCTGGAAACGTG    |
